# Supplementary material for: Proteomics uncover EPHA2 as a potential novel therapeutic target in colorectal cancer cell lines with acquired cetuximab resistance
Source: Springer Nature journal article supplement (doi:10.1007/s00432-022-04416-0), 2022-11-19
Supplement: MOESM1 [file 432_2022_4416_MOESM1_ESM.pdf]

# **Proteomics uncover EPHA2 as a potential novel therapeutic target in colorectal cancer cell lines with acquired cetuximab resistance**

Journal of Cancer Research and Clinical Oncology, 2021

Lucien Torlot<sup>1,3</sup>, Anna Jarzab<sup>2</sup>, Johanna Albert<sup>1</sup>, Ágnes Pók-Udvari<sup>1</sup>, Arndt Stahler<sup>4</sup>, Julian Walter Holch<sup>3,4,5</sup>, Marco Gerlinger<sup>6</sup>, Volker Heinemann<sup>3,4,5</sup>, Thomas Kirchner<sup>1,3,5</sup>, Jörg Kumbink<sup>1,3,5</sup>, Bernhard Küster<sup>2,3</sup>, Andreas Jung<sup>1,3,5,7</sup>

<sup>1</sup> Institute of Pathology, Ludwig-Maximilians-University (LMU), Munich, Germany

<sup>2</sup> Chair of Proteomics and Bioanalytics, Technical University of Munich, Freising, Germany

<sup>3</sup> German Cancer Consortium (DKTK), Heidelberg, Munich site, Germany.

<sup>4</sup> Department of Medicine III, LMU Hospital, Munich, Germany

<sup>5</sup> Comprehensive Cancer Center, LMU Hospital, Munich, Germany

<sup>6</sup> Translational Oncogenomics Lab, The Institute of Cancer Research, London, UK

<sup>7</sup> Corresponding author: [andreas.jung@lmu.de](mailto:andreas.jung@lmu.de)

## **Supplementary information**

### **Supplementary figures:**

- Supplementary figure S1: Sensitivity to cetuximab and dasatinib of parental and resistant cell lines.
- Supplementary figure S2: Scatter plots of protein expression levels.
- Supplementary figure S3: LC-MS/MS based proteomics identifies overexpressed kinases in resistant cell lines.
- Supplementary figure S4: Successful EPHA2 knockdown using RNAi.

### **Supplementary tables**

- Supplementary table 1: Next generation sequencing results of Lim1215 and DiFi cell lines.
- Supplementary table 2: Kinase overexpression in resistant Lim1215 and DiFi cell lines.

### **Supplementary materials and methods**

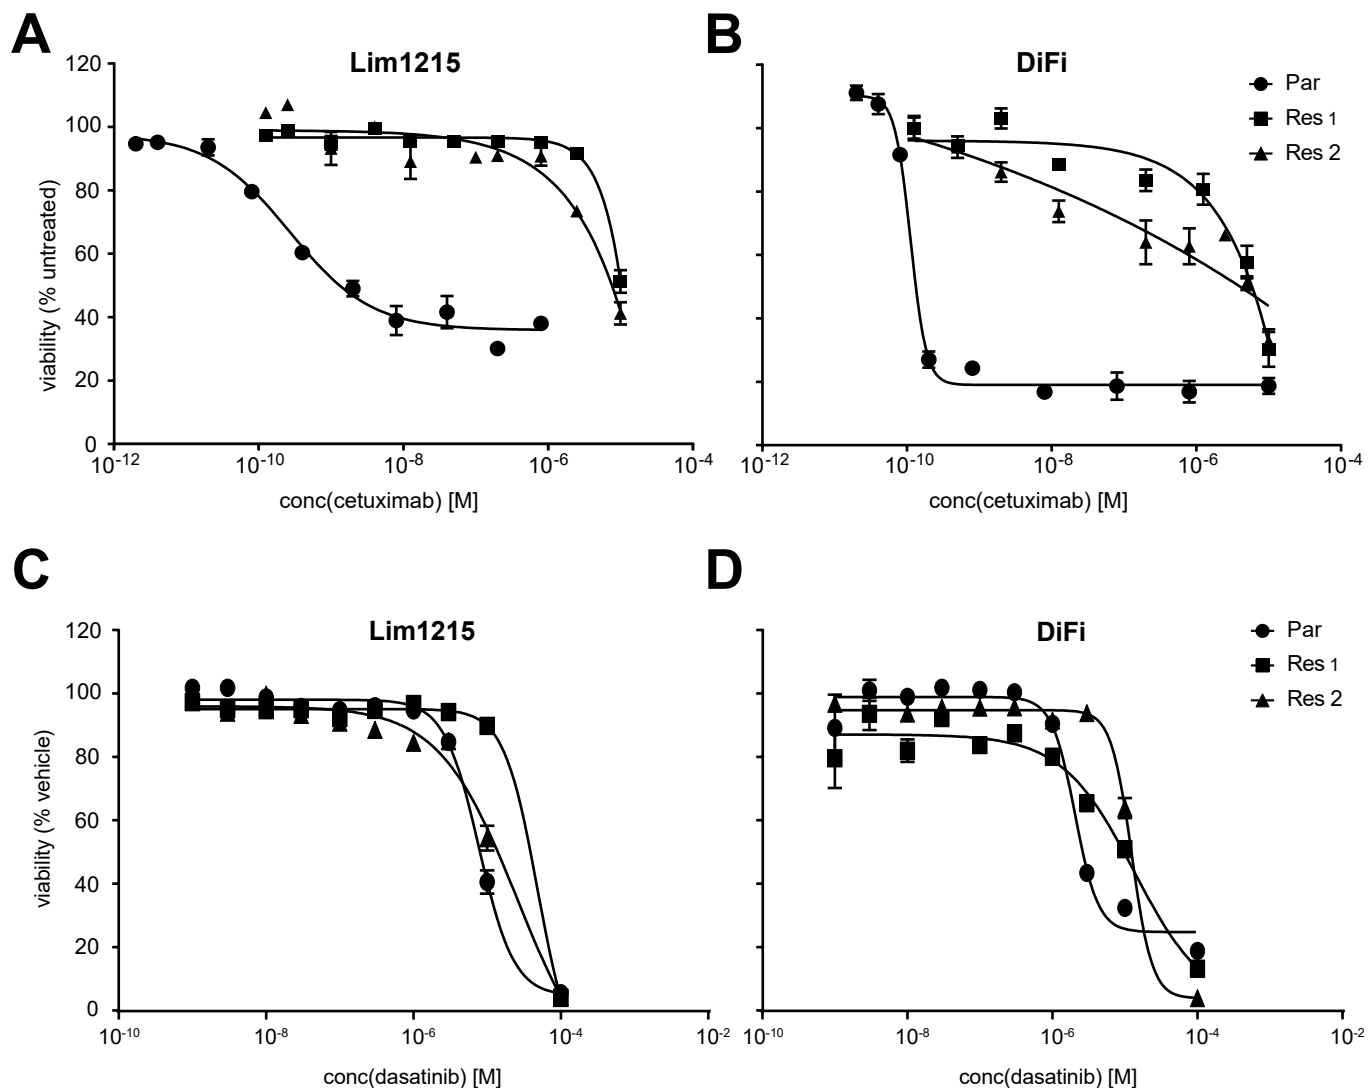

**Supplementary figure S1:** Sensitivity to cetuximab and dasatinib of parental and resistant cell lines. In Lim1215 and DiFi, parental (Par) and resistant cell lines (R1 & R2) were treated for 48h with increasing doses of cetuximab (**A**, **B**) or for 72h with increasing doses of dasatinib (**C**, **D**). Viability was measured using alamarBlue® reagent. Respectively representative of three experiments. Graphed data represents mean relative viability (compared to untreated or vehicle treated cells)  $\pm$  SEM of 3 technical replicates.

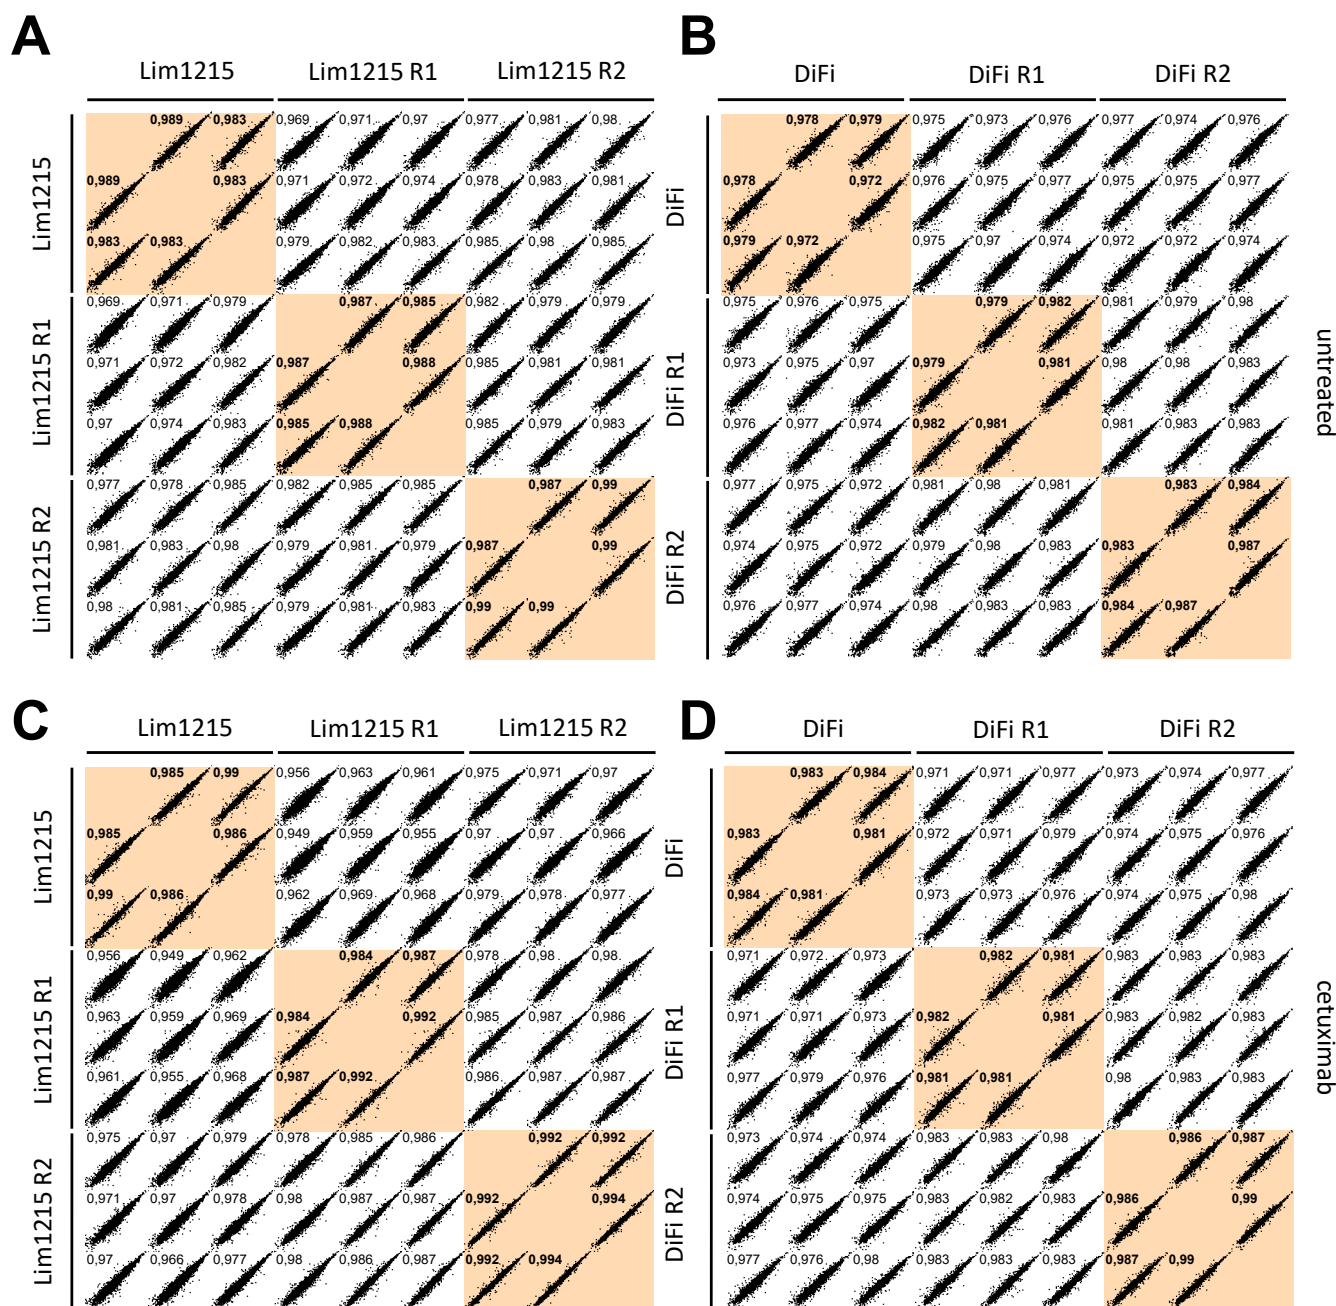

**Supplementary figure S2:** Scatter plots display the correlation of protein expression data between each of the samples and associated Pearson R. Individual replicates of Lim1215 (**A**, **C**) and DiFi cell lines (**B**, **D**) show an excellent correlation of protein expression data (Pearson R > 0.98) according to the experimental setting (untreated **A**, **B**; cetuximab **C**, **D**).

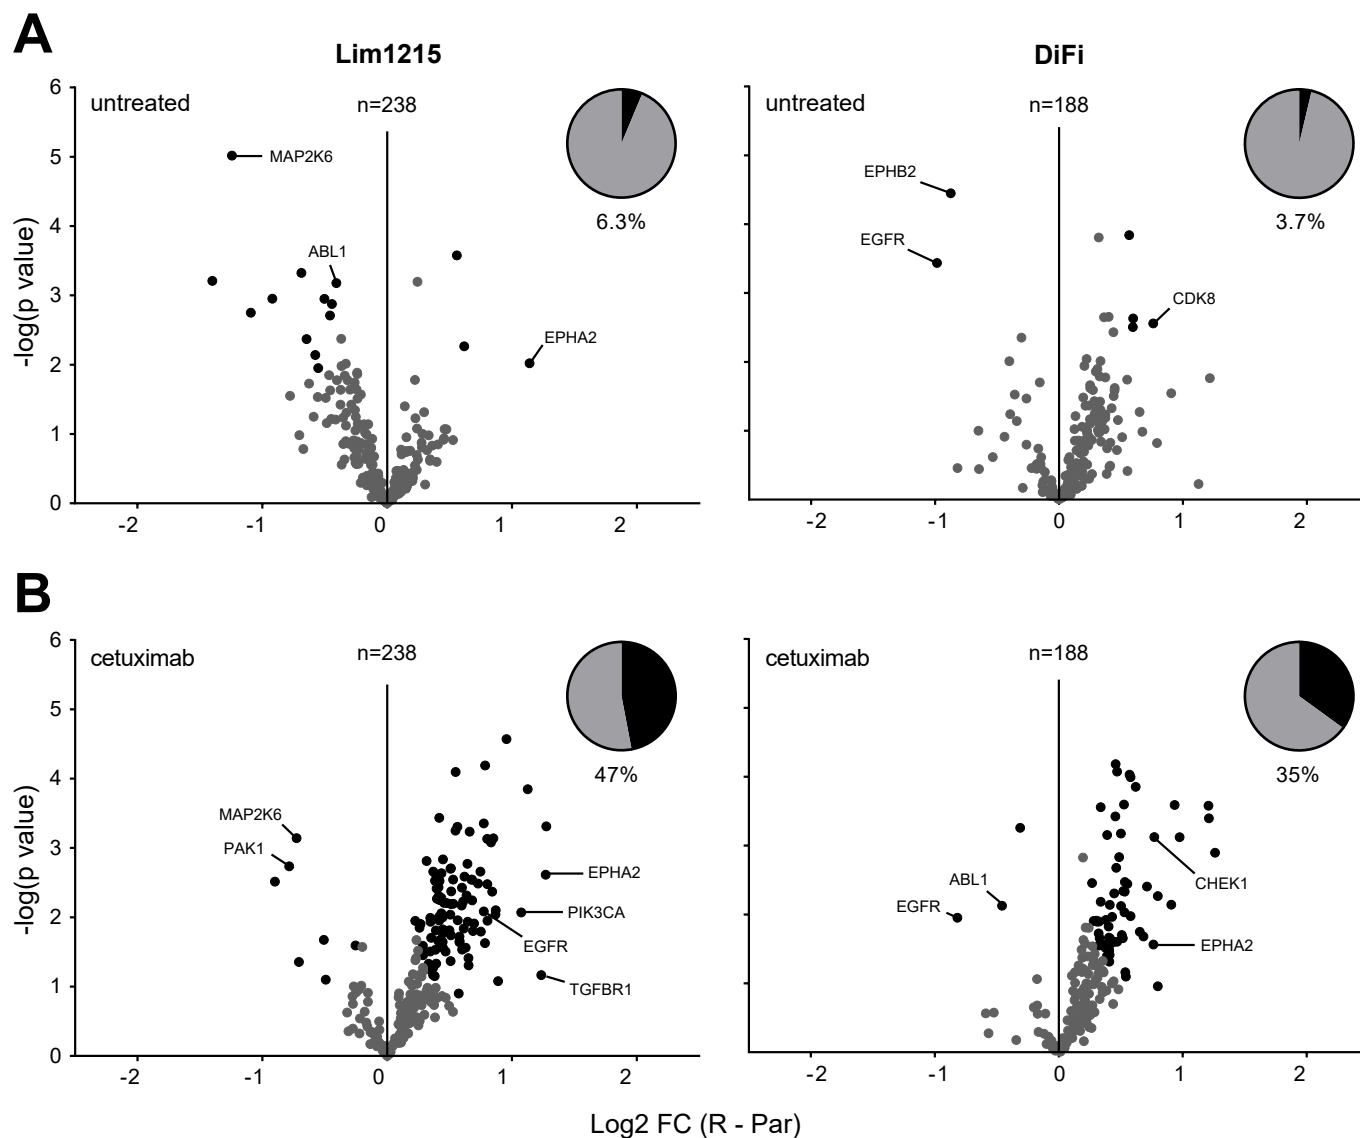

**Supplementary figure S3:** LC-MS/MS based proteomics identifies overexpressed kinases in resistant cell lines. **(A, B)** Volcano plots of protein kinase expression changes in resistant cells compared to parental cells. Expression differences were plotted as log2 fold-change (FC) against the significance of the difference (FDR<0.05; S0 of 0.1; black dots). Both resistant cell lines (R) were jointly compared to their parental counterpart (Par) in the untreated **(A)** and cetuximab treated **(B)** state.

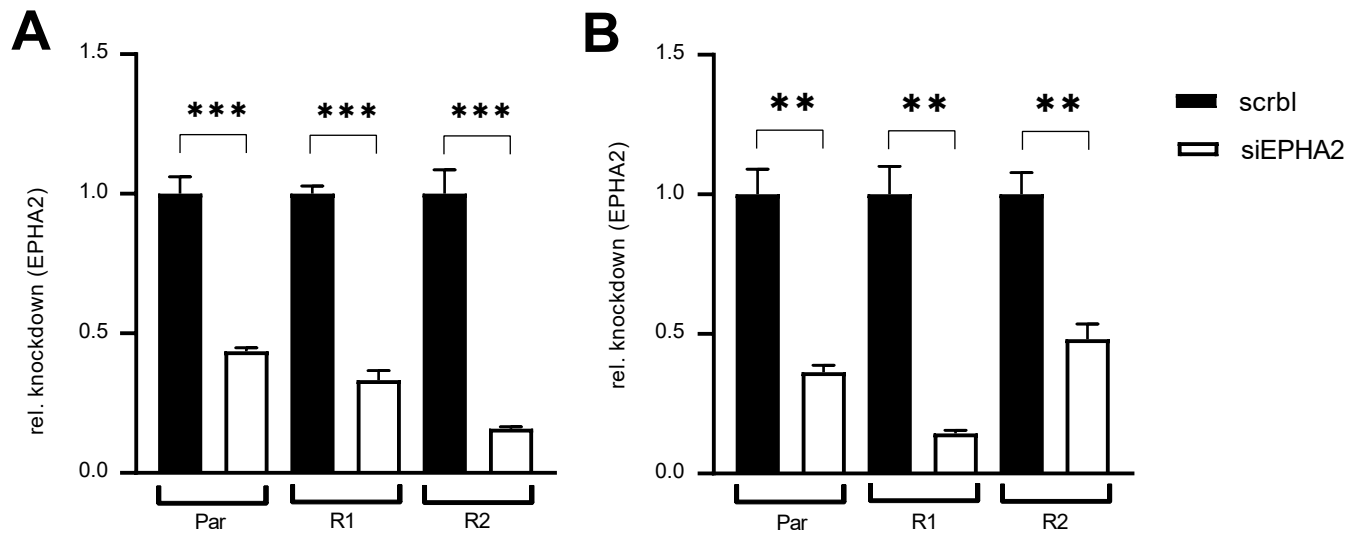

**Supplementary figure S4:** Successful EPHA2 knockdown using RNAi. RT-qPCR show EPHA2 gene expression knockdown using RNAi is highly successful in all Lim1215 (**A**) and DiFi (**B**) cell lines. Representative of 3 experiments performed in triplicates. Graphs shows mean relative change to parental cell lines  $\pm$  SEM. Significance assessed by two-sided Student's *t* test.

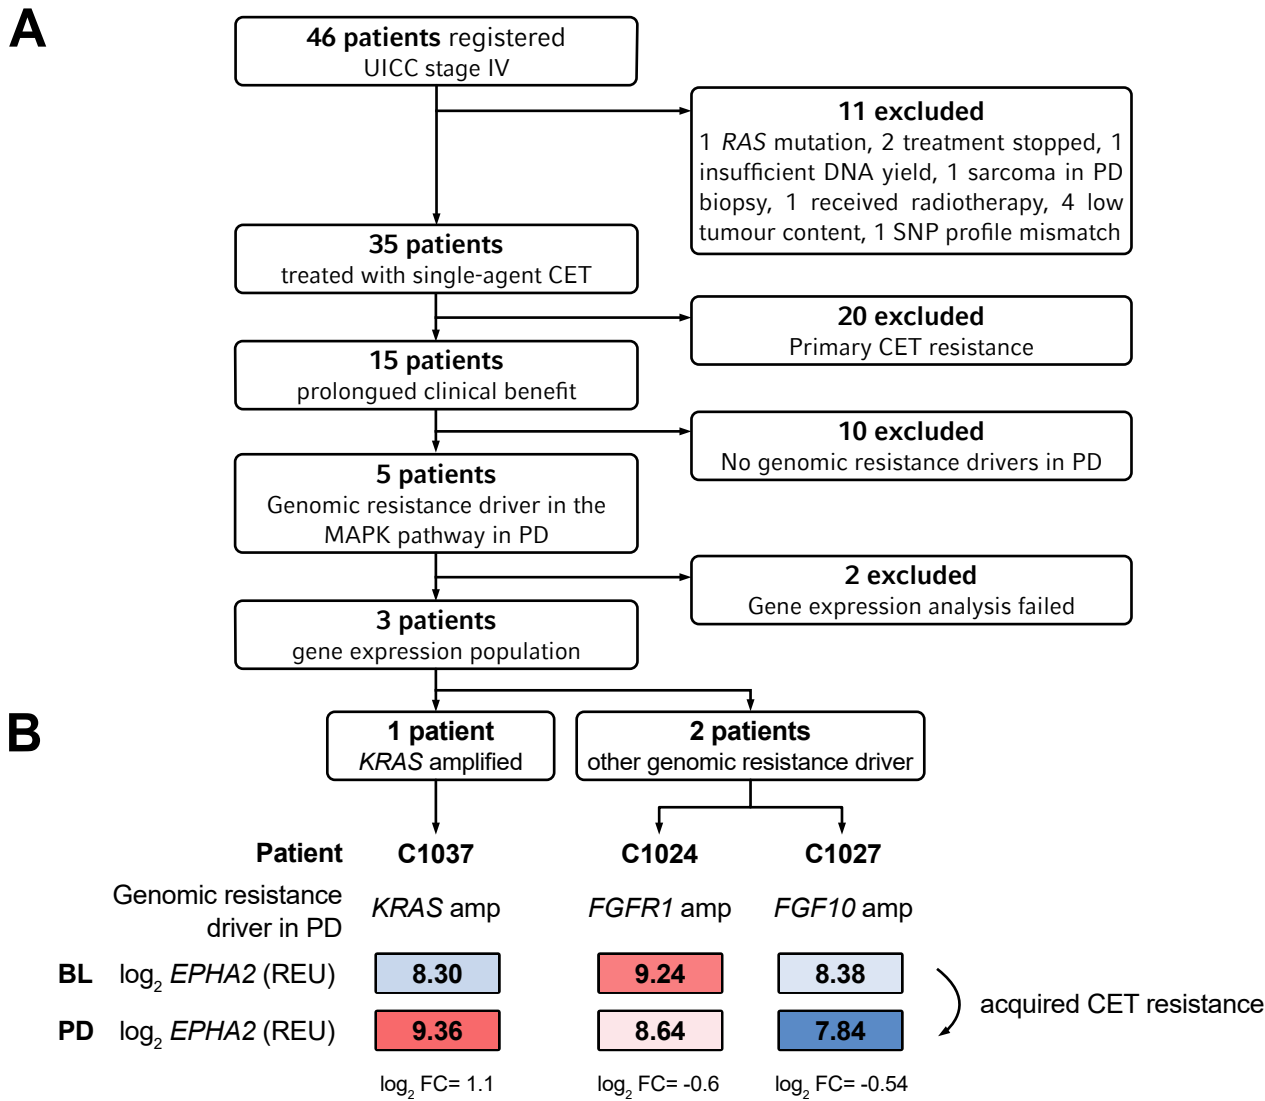

**Supplementary figure S5:** *EPHA2* may be overexpressed in CET resistant, *KRAS* altered mCRC patients. **(A)** Prospect-C trial CONSORT diagram. **(B)** Tumour transcriptomic and genomic characteristics of mCRC patients with acquired CET resistance. *EPHA2* expression level in  $\log_2$  REU (relative expression units). SNP - single nucleotide polymorphism. amp - gene amplification. BL - baseline biopsy. PD - progressive disease biopsy.

| cell line  | chrom. pos.    | gene   | cDNA     | type | exon | Ref. mRNA   | Protein     | Cov. | CNV (fold) | AF    | clinical significance |
|------------|----------------|--------|----------|------|------|-------------|-------------|------|------------|-------|-----------------------|
| Lim1215    | chr3:41266124  | CTNNB1 | c.121A>G | SNV  | 3    | NM_001904.3 | p.Thr41Ala  | 1997 |            | 100   | path, lik path        |
|            | chr15:66774159 | MAP2K1 | c.635G>A | SNV  | 6    | NM_002755.3 | p.Ser212Asn | 1997 |            | 100   | prob path             |
| Lim1215 R1 | chr3:41266124  | CTNNB1 | c.121A>G | SNV  | 3    | NM_001904.3 | p.Thr41Ala  | 1739 |            | 100   | path, lik path        |
|            | chr12:25398285 | KRAS   | c.34G>C  | SNV  | 2    | NM_033360.3 | p.Gly12Arg  | 1607 |            | 49.41 | path                  |
|            | chr15:66774159 | MAP2K1 | c.635G>A | SNV  | 6    | NM_002755.3 | p.Ser212Asn | 1997 |            | 100   | prob path             |
| Lim1215 R2 | chr3:41266124  | CTNNB1 | c.121A>G | SNV  | 3    | NM_001904.3 | p.Thr41Ala  | 736  |            | 100   | path, lik path        |
|            | chr12:25398281 | KRAS   | c.38G>A  | SNV  | 2    | NM_033360.3 | p.Gly13Asp  | 980  |            | 50.51 | path, lik path        |
|            | chr15:66774159 | MAP2K1 | c.635G>A | SNV  | 6    | NM_002755.3 | p.Ser212Asn | 1346 |            | 100   | prob path             |
| DiFi       | chr7:55198955  | EGFR   |          | CNV  |      |             |             |      | 10.7       |       | path, lik path        |
| DiFi R1    | chr7:55198955  | EGFR   |          | CNV  |      |             |             |      | 6.7        |       | path, lik path        |
|            | chr12:25364760 | KRAS   |          | CNV  |      |             |             |      | 21.7       |       | path, lik path        |
| DiFi R2    | chr7:55198955  | EGFR   |          | CNV  |      |             |             |      | 6.7        |       | path, lik path        |
|            | chr12:25364760 | KRAS   |          | CNV  |      |             |             |      | 28.7       |       | path, lik path        |

**Suppl. table 1: Next generation sequencing results (Oncomine Focus Assay)**

**AF**, allele frequency; **cDNA**, complementary DNA; **CNV**, copy number variation; **Cov.**, Coverage; **lik path**, likely pathogenic; **path**, pathogenic; **prob path**, probably pathogenic (based on prediction algorithms, no information in ClinVar); **SNV**, single nucleotide variant

Lim1215 cetuximab treated

| Rank | Gene names | log2 FC     | "-log(p_adj)" |
|------|------------|-------------|---------------|
| 1    | EPHA1      | 1,274564743 | 3,3110129     |
| 2    | EPHA2      | 1,27055645  | 2,61315458    |
| 3    | TGFBR1     | 1,235226075 | 1,1671055     |
| 4    | MLKL       | 1,126009782 | 3,8482497     |
| 5    | PIK3CA     | 1,073595524 | 2,06970671    |
| 6    | POMK       | 0,956455072 | 4,56944673    |
| 7    | MAPK6      | 0,888480028 | 1,07951107    |
| 8    | CDK8       | 0,870285034 | 2,10149655    |
| 9    | ATR        | 0,866937002 | 2,03912947    |
| 10   | PBK        | 0,850308259 | 3,13839952    |
| 11   | PRKCI      | 0,841203372 | 2,3702287     |
| 12   | CAMK4      | 0,832149982 | 3,079231      |
| 13   | PLK1       | 0,8037467   | 1,95116548    |
| 14   | CDK9       | 0,801906745 | 2,47733245    |
| 15   | MAPK14     | 0,801093419 | 3,13022096    |
| 16   | MAP2K1     | 0,784678459 | 4,18940419    |
| 17   | CSNK1G2    | 0,783434391 | 1,62862765    |
| 18   | ADRBK1     | 0,773893356 | 3,35425415    |
| 19   | EGFR       | 0,773827235 | 2,08404717    |
| 20   | PRKCE      | 0,750103315 | 1,79324922    |
| 21   | GRK6       | 0,746706645 | 2,65787189    |
| 22   | ACVR1      | 0,728495121 | 2,48605498    |
| 23   | FRK        | 0,695926666 | 1,90992439    |
| 24   | PIK3R4     | 0,687929948 | 1,8015082     |
| 25   | MET        | 0,680924892 | 2,24394443    |

Lim1215 untreated

| Rank | Gene names | log2 FC    | "-log(p_adj)" |
|------|------------|------------|---------------|
| 1    | EPHA2      | 1,14034303 | 2,02111845    |
| 2    | SCYL1      | 0,61746661 | 2,26540524    |
| 3    | PXK        | 0,55812836 | 3,57640291    |
| 4    | EPHA1      | 0,52683512 | 0,91350351    |
| 5    | MET        | 0,47411489 | 1,06912444    |
| 6    | SRC        | 0,45997969 | 1,06965208    |
| 7    | PRKCD      | 0,45149358 | 0,91692353    |
| 8    | RIOK3      | 0,40691837 | 0,84853068    |
| 9    | POMK       | 0,39618031 | 0,59838905    |
| 10   | NEK3       | 0,36072556 | 0,8317588     |
| 11   | CSNK1G2    | 0,34410779 | 0,63547629    |
| 12   | MAPK6      | 0,34278123 | 0,61269525    |
| 13   | CSNK1G3    | 0,33609327 | 0,97854093    |
| 14   | LIMK1      | 0,33242003 | 0,98225864    |
| 15   | LMTK2      | 0,31947851 | 0,76594156    |
| 16   | TGFBR1     | 3,04E-01   | 2,71E-01      |
| 17   | ACVR1      | 0,29629962 | 1,31586214    |
| 18   | RIOK1      | 0,28255018 | 1,00319602    |
| 19   | RPS6KB2    | 0,27856159 | 0,80687021    |
| 20   | SMG1       | 0,27541987 | 0,87544519    |
| 21   | MTOR       | 0,24564997 | 0,63225135    |
| 22   | EIF2AK4    | 0,24293534 | 3,19677906    |
| 23   | MAP3K11    | 0,23903131 | 1,0783843     |
| 24   | CDK8       | 0,23718007 | 0,48266882    |
| 25   | PHKG2      | 0,23655621 | 0,69643722    |

**Suppl. table 2: Kinase overexpression in resistant Lim1215 and DiFi cell lines**

Top 25 overexpressed kinases in CMAB resistant Lim1215 and DiFi cell lines compared to parental cells in the CMAB treated and untreated setting. Log2 FC represent fold change difference of both resistant cell lines compared to their parental counterpart. -log(p) represents FDR corrected p value of the change.

DiFi cetuximab treated

| Rank | Gene names | log2 FC    | "-log(p_adj)" |
|------|------------|------------|---------------|
| 1    | MASTL      | 1,65573835 | 4,35745082    |
| 2    | ADRBK1     | 1,26054096 | 2,89787209    |
| 3    | MELK       | 1,2105848  | 3,39680999    |
| 4    | TTK        | 1,20751826 | 3,57960373    |
| 5    | MLKL       | 0,97436523 | 3,12294611    |
| 6    | CIT        | 0,9346935  | 3,59039003    |
| 7    | AURKB      | 0,90800158 | 2,14207447    |
| 8    | RIOK1      | 0,79893478 | 0,95874581    |
| 9    | JAK1       | 0,79883989 | 2,26830918    |
| 10   | CHEK1      | 0,77092346 | 3,1246356     |
| 11   | EPHA2      | 0,76349004 | 1,56433743    |
| 12   | PRKCI      | 0,71169949 | 2,40562509    |
| 13   | CDK8       | 0,68355497 | 1,67985447    |
| 14   | CSNK1D     | 0,653368   | 1,74949673    |
| 15   | TNK2       | 0,6208237  | 3,85303334    |
| 16   | STK4       | 0,5790952  | 3,99459178    |
| 17   | VRK1       | 0,57884343 | 1,97574363    |
| 18   | SGK223     | 0,57099501 | 4,03071201    |
| 19   | ERBB2      | 0,55374527 | 2,44483608    |
| 20   | PIK3R4     | 0,54120175 | 1,09731308    |
| 21   | BUB1B      | 0,53669691 | 1,16171811    |
| 22   | PEAK1      | 0,53280179 | 2,47140144    |
| 23   | MAP2K1     | 0,53183683 | 2,33052985    |
| 24   | MET        | 0,52941847 | 2,03221531    |
| 25   | MAP2K4     | 0,52622143 | 3,5973355     |

DiFi untreated

| Rank | Gene names | log2 FC    | "-log(p_adj)" |
|------|------------|------------|---------------|
| 1    | MAP2K6     | 1,21732855 | 1,76328902    |
| 2    | ERBB2      | 1,12556966 | 0,22586989    |
| 3    | TBK1       | 0,90518665 | 1,54513335    |
| 4    | CHEK2      | 0,79019499 | 0,82240179    |
| 5    | CDK8       | 0,75954549 | 2,55830943    |
| 6    | ABL2       | 0,67202473 | 0,98516021    |
| 7    | STK16      | 0,65002473 | 1,27194746    |
| 8    | TNNI3K     | 0,59784476 | 2,63057749    |
| 9    | SGK223     | 0,59568628 | 2,50598984    |
| 10   | SCYL2      | 0,56676006 | 3,84182578    |
| 11   | SYK        | 0,55220652 | 0,41563186    |
| 12   | SLK        | 0,55026515 | 1,74145271    |
| 13   | LATS1      | 0,50908995 | 0,90723856    |
| 14   | AKT1       | 0,47522688 | 1,15474163    |
| 15   | PRKCA      | 0,46668657 | 0,7199697     |
| 16   | MAP2K3     | 0,44967508 | 1,62101756    |
| 17   | MAPKAPK2   | 0,4479332  | 1,58418001    |
| 18   | MAP3K4     | 0,44114987 | 1,50517891    |
| 19   | CIT        | 0,43852011 | 2,43168224    |
| 20   | VRK2       | 0,42497476 | 1,32740823    |
| 21   | PDK2       | 0,41370646 | 0,82562402    |
| 22   | EPHA2      | 0,41300853 | 0,49137482    |
| 23   | IGF1R      | 0,40715154 | 0,47432772    |
| 24   | CSK        | 0,40080976 | 2,65411194    |
| 25   | TGFBR2     | 0,38802497 | 0,74497334    |

**Suppl. table 2: Kinase overexpression in resistant Lim1215 and DiFi cell lines**

Top 25 overexpressed kinases in CMAB resistant Lim1215 and DiFi cell lines compared to parental cells in the CMAB treated and untreated setting. Log2 FC represent fold change difference of both resistant cell lines compared to their parental counterpart. -log(p) represents FDR corrected p value of the change.

## **Supplementary materials and methods**

### **LC-MS/MS**

#### **Protein digestion, TMT-labeling and peptide fractionation**

Cell lysates were adjusted to 1mg/ml and 100µg proteins from each biological replicate were reduced with 10mM DTT for 45min at 37°C and alkylated with 55mM chloro-acetamide for 30min at room temperature in the darkness. Lysates were diluted with 5 volumes of 40mM Tris-HCl, pH 7.6 to decrease the concentration of urea prior trypsinization. Digestion was performed by adding trypsin (Promega, Mannheim, Germany) in a 1:50 (w/w) enzyme-to-substrate ratio and incubating overnight at 37°C in a thermoshaker at 700rpm. On the next day samples were acidified by addition of formic acid (FA) to a concentration of 0.5% (v/v) to stop proteolysis and desalted using self-packed stage-tips (10 discs, Ø 1.5mm, C18 material, 3M Empore™ Octadecyl C18, Saint Paul, MN, USA; wash solvent: 0.1% FA; elution solvent: 60% ACN in 0.1% FA). Peptide solutions were frozen at -80°C and dried in a SpeedVac. 100µg of protein digests were dissolved in 50mM HEPES, pH 8.5 and mixed for 10min at 20°C. TMT reagent (Thermo Fisher Scientific), dissolved in 100% anhydrous ACN was added to each vial to the final concentration of 11.6mM. Samples were incubated at 400rpm on a thermomixer for 1 hour at 20°C. The reaction was stopped by adding hydroxylamine to a final concentration of 0.4% and incubated for 15 min at 20°C at 400rpm. Labeled peptide solutions were pooled and desalted on 50mg Sep-Pak tC18, reversed-phase (RP) solid-phase extraction cartridges (Waters Corp., Finglas, Ireland; wash solvent: 0.1% FA; elution solvent: 60% CAN in 0.1% FA). TMT-labeled sample pools were fractionated on a Trinity P1 column (Thermo Fisher Scientific) using a Dionex Ultimate 3000 HPLC System (Dionex Corporation, Idstein, Germany) at a flow rate of 300µl/min. 100µg of protein digests were loaded onto the column in solvent A (10mM ammonium acetate in water, pH 4.7) and separated in a gradient of solvent B (95% acetonitrile in 10mM ammonium acetate, pH 5.4). Samples were collected in 32 fractions, dried down in a SpeedVac and measured on LC-MS.

#### **LC-MS/MS analysis**

1µg of each fraction was resuspended in 0.1% FA in water and injected into an Ultimate 3000 SD HPLC (Thermo Fisher Scientific) coupled to a Q Exactive HF (Thermo Fisher Scientific). Peptides were delivered to a trap column (75µm x 2cm, packed in house with 5µm C18 resin, Reprosil PUR AQ, Dr. Maisch, Ammerbuch, Germany) for 10 min at a flow rate of 5µl/min in loading solvent (0.1% FA in water) and separated on the analytical column (75µm x 45cm, packed in house with 3µm C18 resin, Reprosil Gold, Dr. Maisch) using a 90 min gradient (solvent A: 0.1% FA, 5% DMSO; solvent B: 0.1% FA, 5% DMSO in ACN). The Q-Exactive HF was operated in data-dependent acquisition (DDA) and positive ion mode, automatically switching between MS1 and MS2. Full-scan MS1 spectra were acquired from 360 to 1300m/z, 60,000 resolution, automatic gain control (AGC) target value of  $3 \times 10^6$  charges and a maximum injection time (maxIT) of 10ms. We allowed up to 25 precursor ions to be selected for fragmentation. MS2 spectra were acquired at 100 to 1200m/z at 30,000 resolution to enable resolution of all TMT labels, AGC target value of  $1 \times 10^3$  charges and maximum injection time of 55ms.

### **Database searching and data analysis**

Peptide and protein identification and quantification were performed using MaxQuant (v1.5.5.1) with embedded Andromeda search engine. Spectra were searched against the UniProt databases (human, 48556 entries, downloaded on 19.07.2017). Trypsin/P was selected as proteolytic enzyme and up to two missed cleavage sites were allowed. Carbamido-methylation of cysteine was set up as fixed modifications and oxidation of methionine, and-N-terminal protein acetylation as variable modifications. The mass tolerance of precursor ions was set to 5ppm and for fragmentation to 20ppm. An FDR cut-off of 0.01 was used for identification of peptides and proteins. To facilitate further data analysis, the results were imported into the MaxQuant associated software suite Perseus (v.1.5.4.1). Quantification was performed TMT based. A Benjamini-Hochberg FDR corrected two-sided student's *t* test was used to assess statistical significance (FDR<0.05, SO of 0.1).

### **Transcriptomic and clinical data**

#### **Patients and samples**

Patient recruitment and sample acquisition for the Prospect-C trial have been described previously<sup>1</sup>. Of the 35 recruited *RAS* wildtype patients treated with single-agent cetuximab with successful baseline (BL) tissue sequencing, 15 patients showed prolonged treatment benefit as defined by RECIST criteria before progressive disease (PD). CET resistance was attributable to genomic alterations in the *RAS*/*RAF* pathway in 5/15 (33%) patients, as identified by tissue biopsy sequencing. Transcriptomic data was available for 3/5 patients (C1005, C1027, C1037).

#### **Somatic mutation analysis, DNA copy number aberration and ctDNA-sequencing**

Tissue biopsy exome sequencing and DNA copy number variation analysis were described elsewhere<sup>1</sup>.

#### **Transcriptomic data**

Gene expression data from the Prospect-C trial were generated as described previously<sup>1</sup>.

## **Materials**

### **Primer sequences**

| Name    | UPL | Sequence              | Manufacturer     |
|---------|-----|-----------------------|------------------|
| EPHA2 F | #89 | CCCCAAGTTCGCTGACAT    | biomers.net GmbH |
| EPHA2 R | #89 | GGGGAGCCGGATAGACAC    | biomers.net GmbH |
| GAPDH F | #60 | AGCCACATCGCTCAGACAC   | biomers.net GmbH |
| GAPDH R | #60 | GCCCAATACGACCAATCC    | biomers.net GmbH |
| EFNA1 F | #43 | GGAGAAGAGACTTGCAGCAGA | biomers.net GmbH |
| EFNA1 R | #43 | TCCAGGCAAGTGGGAAGA    | biomers.net GmbH |

All primers were used in 500nM working concentrations; UPL – universal probe library, Hoffmann-La Roche

### **Antibodies**

| Name              | Clone # | Manufacturer |
|-------------------|---------|--------------|
| $\alpha$ -EPHA2   | 1C11A12 | Invitrogen   |
| $\alpha$ -EPHA2   | AF3035  | R&D Systems  |
| $\alpha$ -GFP     | AF4240  | R&D Systems  |
| $\alpha$ -Tubulin | TU-01   | Invitrogen   |

### **siRNA**

| Name         | Target sequence           | Manufacturer             |
|--------------|---------------------------|--------------------------|
| siEphA2      | CAGCGCCAAGUAAACAGGGUA     | Qiagen                   |
| siControl xx | ACAACGAAGCUCCGUCCCUACCGAA | Thermo Fisher Scientific |

## **Supplementary references**

1. Woolston A, Khan K, Spain G, et al. Genomic and Transcriptomic Determinants of Therapy Resistance and Immune Landscape Evolution during Anti-EGFR Treatment in Colorectal Cancer. *Cancer Cell*. 2019;36(1):35-50.e9. doi:10.1016/j.ccell.2019.05.013
